# Supplementary material
Source: Springer Nature journal article supplement (https://www.springermedizin.de/resource/supplementary/12891_2014_2222_MOESM2_ESM.pdf/9509706)

## Lateral Bending (healthy subjects)

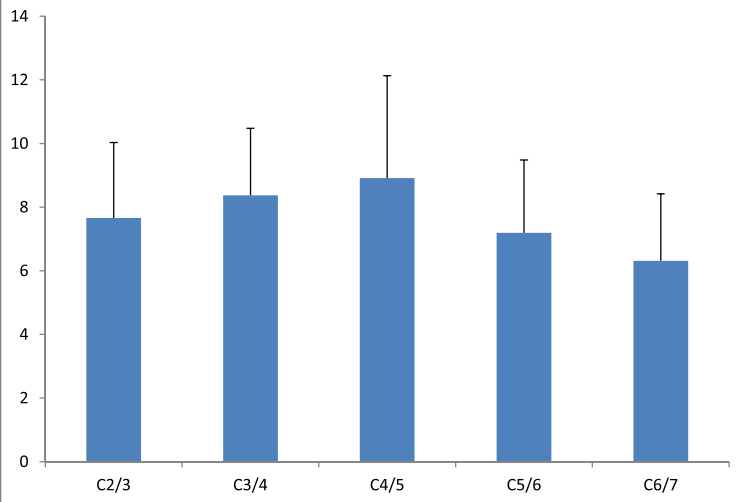

## Lateral Bending (patients with disc herniation)

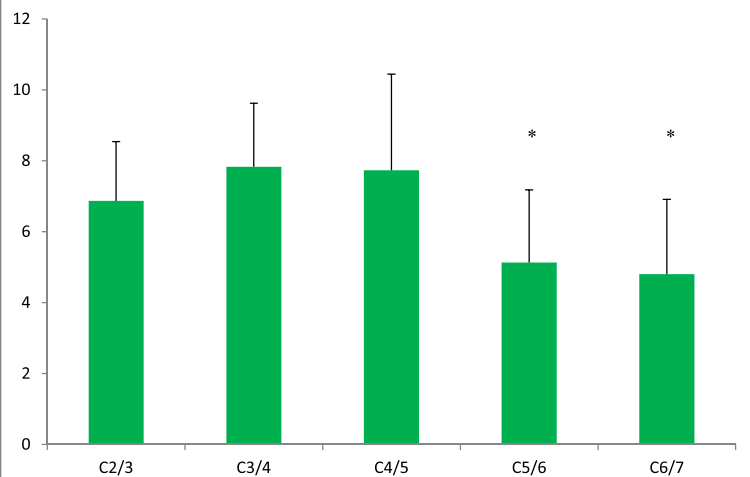

Supplement: MOESM2 [file 9509706]
